# Supplementary material for: Trends in breast, colon, pancreatic, and uterine cancers in women during the COVID‐19 pandemic in North Carolina
Source: PubMed Central journal article supplement (PMC10993709; doi:10.1002/cam4.7156), 2024-04-04
Supplement: CAM4-13-e7156-s005.pdf [file CAM4-13-e7156-s005.pdf]

### A CLINICAL STAGE II OR HIGHER

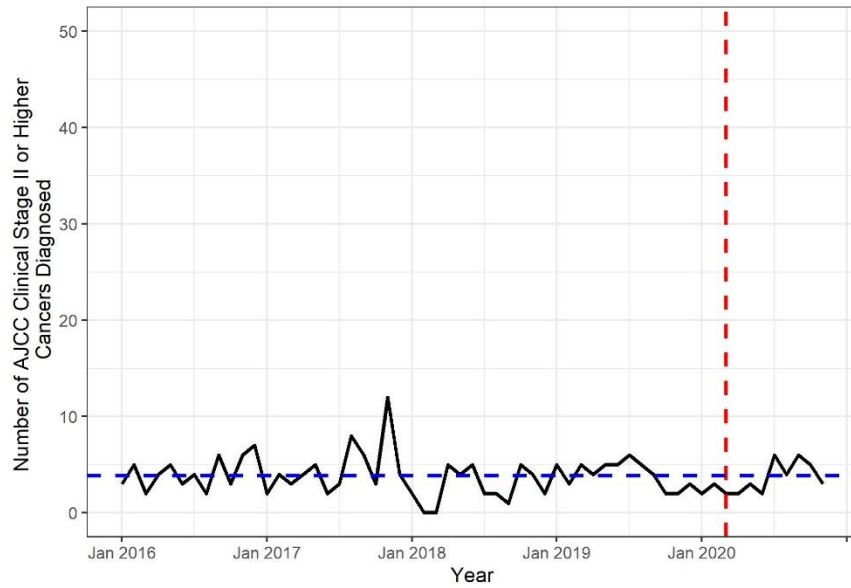

### B CLINICAL STAGE I

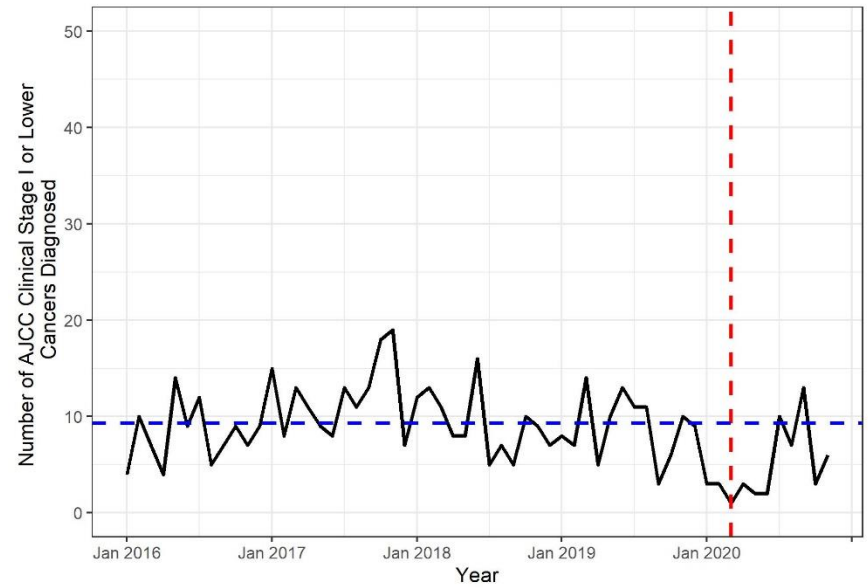

### C 62 MM OR LARGER

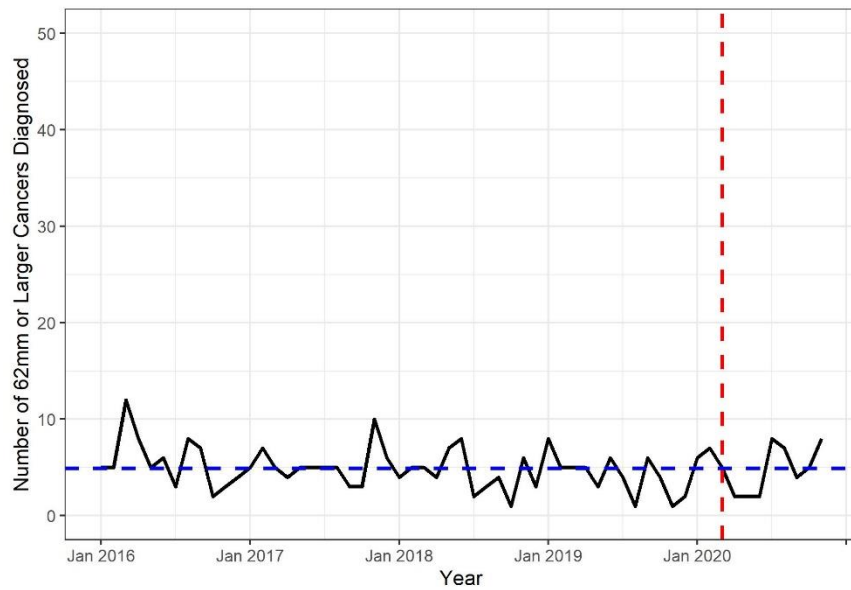

### D LESS THAN 62 MM

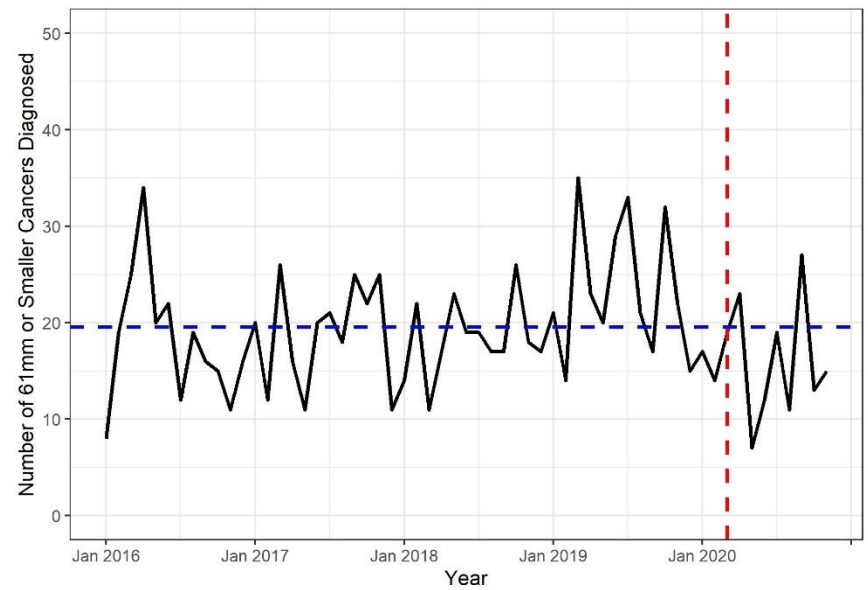

**Supplementary Figure S2. Incidence of poor prognosis uterine cancers between January 2016 and November 2020.** The y-axis reflects the total number of individuals diagnosed and the x-axis reflects the time between January 2016 and November 2020. Raw case counts are shown in black and model-based predicted case counts are shown in blue. The red dashed vertical line marks March 2020, representing the onset of the Covid-19 pandemic in the US. Panel A – clinical stage II or higher, panel B – clinical stage I, panel C – 62 mm or larger in size, panel D – less than 62 mm in size.
